# Supplementary material for: In vivo visualization of bioactive iron and oxygen using the Labile Iron and Oxygen Notifier (LiON)
Source: Research Square preprint supplement (doi:10.21203/rs.3.rs-6892412/v1), 2025-06-30
Supplement: Supplementary file 1 [file dd5228e8931e802fe4717027.docx]

**SUPPLEMENTAL ITEMS AND ITEM LEGENDS**

***In vivo* visualization of bioactive iron and oxygen using the Labile Iron and Oxygen Notifier (LiON)**

Ayato Maeda1,2, Akihiro Nita1, Shoko Sashiyama1,2, Suzu Yoshitomo1,2, Komen Joan Jepkosgei1,2, Yuqing Xu3, Yuichiro Arima3, Keiichi I. Nakayama4, Kimi Araki5, and Toshiro Moroishi1,2,6,*

1Division of Cellular Dynamics, Medical Research Laboratory, Institute of Integrated Research, Institute of Science Tokyo, 1-5-45 Yushima, Tokyo 113-8510, Japan.

2Department of Molecular and Medical Pharmacology, Faculty of Life Sciences, Kumamoto University, 1-1-1 Honjo, Kumamoto 860-8556, Japan.

3Developmental Cardiology Laboratory, International Research Center for Medical Sciences (IRCMS), Kumamoto University, 2-2-1 Honjo, Kumamoto 860-0811, Japan.

4Anticancer Strategies Laboratory, Advanced Research Initiative, Institute of Integrated Research, Institute of Science Tokyo, 1-5-45 Yushima, Tokyo 113-8510, Japan.

5Institute of Resource Development and Analysis, Kumamoto University, 2-2-1 Honjo, Kumamoto 860-0811, Japan.

6Lead contact

*Correspondence: moroishi.toshiro@tmd.ac.jp

**SUPPLEMENTAL FIGURE**

**Figure S1. Labile Iron and Oxygen Notifier (LiON) knock-in mouse generation, related to Figure 3**

(A) Schematic diagram of the strategy used to confirm LiON cassette insertion at the *ROSA26* locus. PCR amplification regions and restriction enzyme recognition sites are indicated. Abbreviations: LA, long arm; SA, short arm; E1, exon 1; E2, exon 2; bGH, bovine growth hormone; polyA, polyadenylation signal.

(B) PCR-amplified DNA fragments, as shown in (A), were digested with the indicated restriction enzymes at 37°C for 1 h and analyzed by agarose gel electrophoresis.

**SUPPLEMENTAL ITEM**

**Video S1. Time-lapse imaging of HEK293A cells expressing Hr–tdT–P2A–mNG (LiON) stimulated with deferoxamine (DFO), related to Figure 1**

Cells were stimulated with 100 µM DFO and time-lapse images were captured every 20 min over 6 h. Scale bar, 100 µm.
